# Supplementary material
Source: PubMed Central journal article supplement (PMC5627655)

Supp. Figure 1

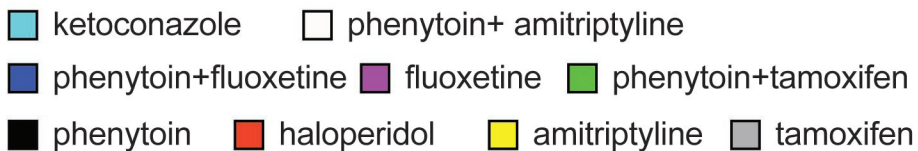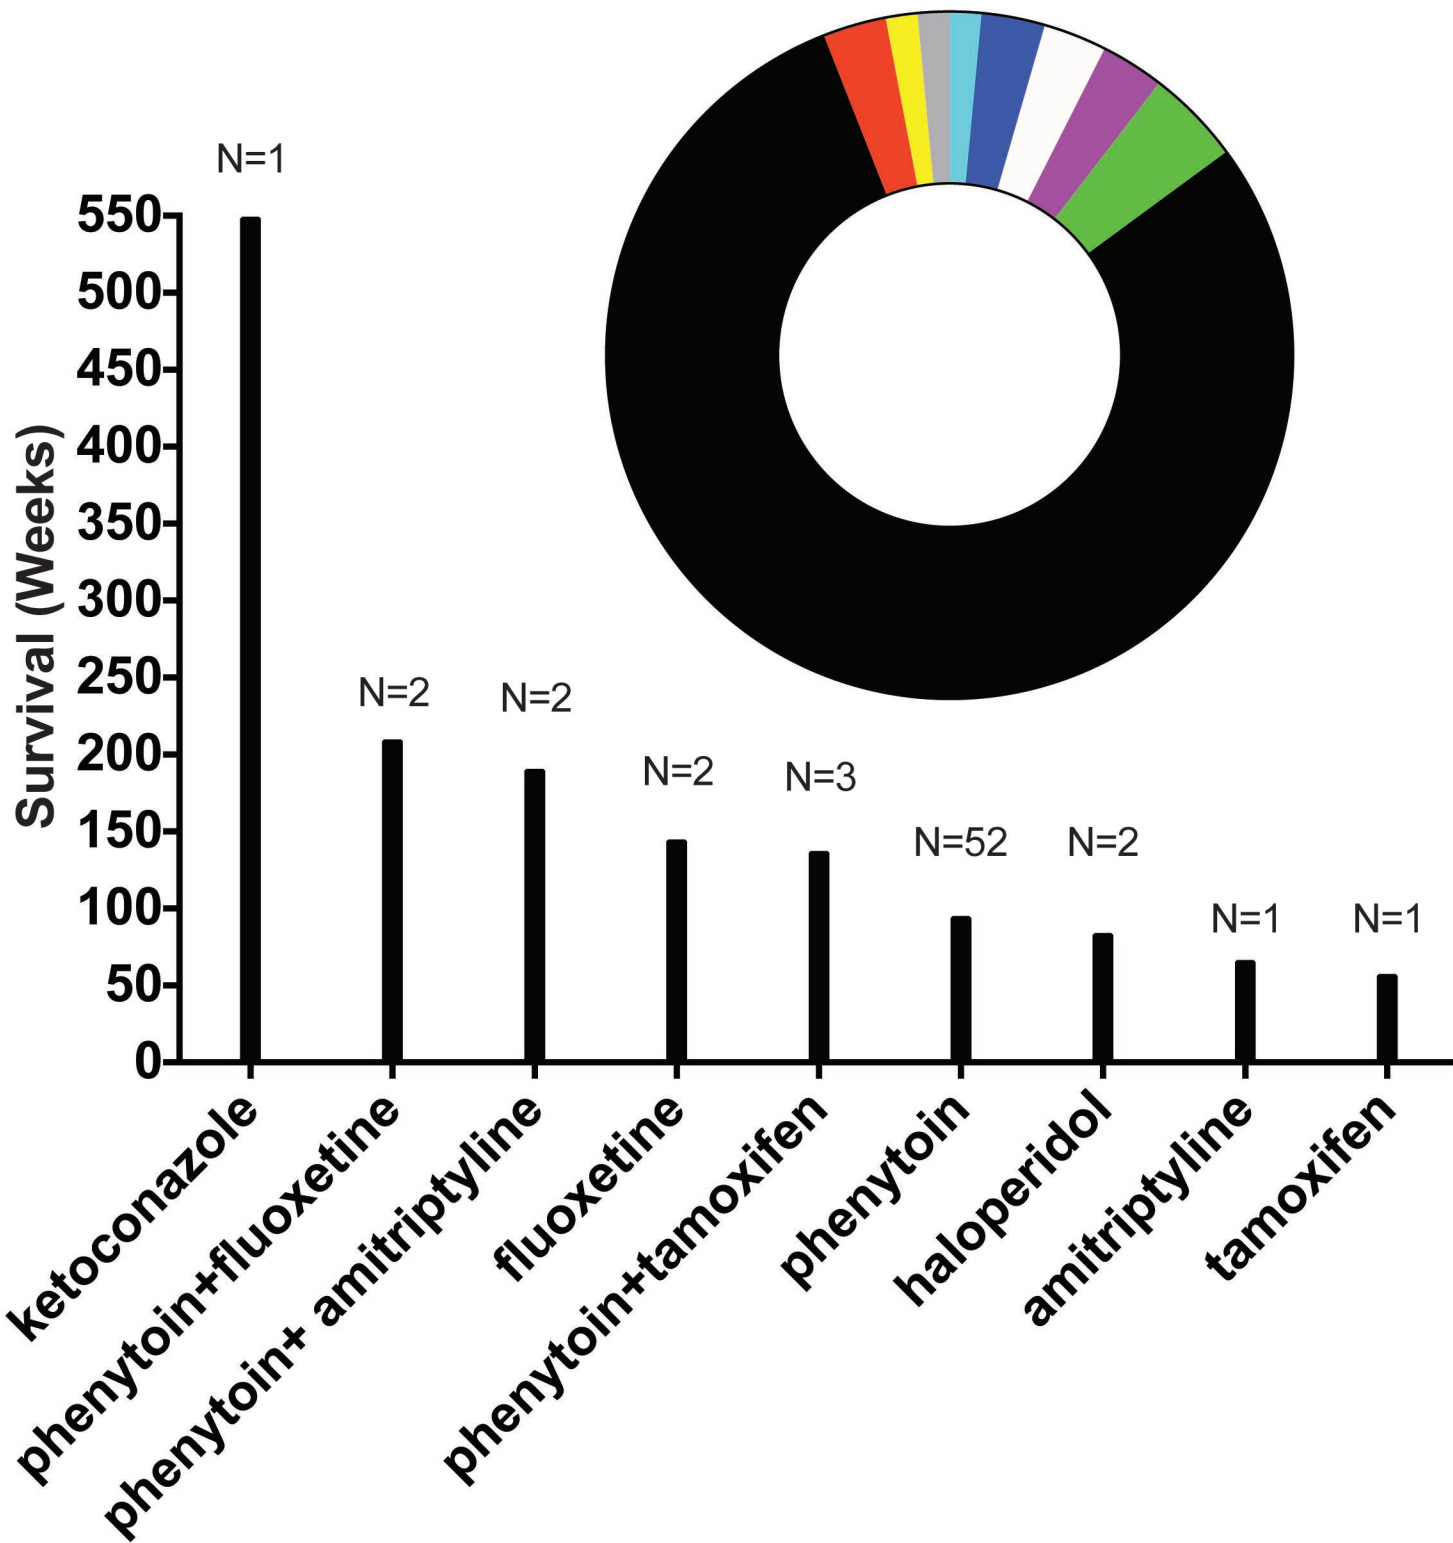

Supplement: NIHMS817250-supplement-1.pdf [file NIHMS817250-supplement-1.pdf]
